# Supplementary material
Source: publisher site journal article supplement (http://e-cmh.org/upload/media/cmh-2023-0485-Supplementary-Table-3.pdf)
Supplement: Supplementary file 1 [file cmh-2023-0485-Supplementary-Table-3.pdf]

**Supplementary Table 3.** Quality assessment

| Study author | Study year: median year | Representativeness of the study population | Sample size | Ascertainment of baseline NAFLD | Ascertainment of outcome | Comparability of study population on the basis of the design or analysis | Duration of follow-up | Loss to follow-up | Total score |
|--------------|-------------------------|--------------------------------------------|-------------|---------------------------------|--------------------------|--------------------------------------------------------------------------|-----------------------|-------------------|-------------|
| Abeles RD    | 2016.5                  | 2                                          | 1           | 1                               | 1                        | 2                                                                        | 0                     | 1                 | 8           |
| Abeles RD    | 1990                    | 2                                          | 1           | 1                               | 1                        | 0                                                                        | 1                     | 1                 | 7           |
| Adams LA     | 2008                    | 2                                          | 1           | 1                               | 1                        | 2                                                                        | 1                     | 1                 | 9           |
| Ahmed HS     | 2009.5                  | 2                                          | 1           | 1                               | 1                        | 0                                                                        | 0                     | 1                 | 6           |
| Ajmera V     | 1996.5                  | 2                                          | 1           | 1                               | 1                        | 0                                                                        | 0                     | 1                 | 6           |
| Akuta N      | 2015                    | 2                                          | 1           | 1                               | 1                        | 0                                                                        | 0                     | 1                 | 6           |
| Alexander M  | 2015                    | 2                                          | 1           | 1                               | 1                        | 0                                                                        | 0                     | 1                 | 6           |
| Alexander M  | 2006.5                  | 2                                          | 1           | 1                               | 1                        | 0                                                                        | 1                     | 1                 | 7           |
| Allen AM     | 2005.5                  | 2                                          | 1           | 1                               | 1                        | 0                                                                        | 1                     | 1                 | 7           |
| Allen AM     | 2007.5                  | 2                                          | 1           | 1                               | 1                        | 2                                                                        | 1                     | 1                 | 9           |
| Allen AM     | 1991                    | 2                                          | 1           | 1                               | 1                        | 2                                                                        | 1                     | 1                 | 9           |
| Alvarez CS   | 2011.5                  | 2                                          | 1           | 1                               | 1                        | 2                                                                        | 0                     | 1                 | 8           |
| Ampuero J    | 2010.5                  | 2                                          | 1           | 1                               | 1                        | 2                                                                        | 1                     | 1                 | 9           |
| Ampuero J    | 2006.5                  | 2                                          | 1           | 1                               | 1                        | 0                                                                        | 1                     | 1                 | 7           |
| Angulo P     | 1993.5                  | 2                                          | 1           | 1                               | 1                        | 2                                                                        | 1                     | 1                 | 9           |
| Angulo P     | 2002                    | 2                                          | 1           | 1                               | 1                        | 0                                                                        | 0                     | 1                 | 6           |
| Arase Y      | 2002                    | 2                                          | 1           | 1                               | 1                        | 0                                                                        | 1                     | 1                 | 7           |
| Arase Y      | 2005                    | 2                                          | 1           | 1                               | 1                        | 0                                                                        | 1                     | 1                 | 7           |
| Ascha MS     | 2007                    | 2                                          | 1           | 1                               | 1                        | 0                                                                        | 1                     | 1                 | 7           |
| Bae JC       | 2010.5                  | 2                                          | 1           | 1                               | 1                        | 0                                                                        | 1                     | 1                 | 7           |
| Bertot LC    | 1995                    | 2                                          | 1           | 1                               | 1                        | 0                                                                        | 1                     | 1                 | 7           |
| Bhala N      | 1990                    | 2                                          | 1           | 1                               | 1                        | 2                                                                        | 1                     | 1                 | 9           |
| Björkstöm K  | 2012                    | 2                                          | 1           | 1                               | 1                        | 0                                                                        | 0                     | 1                 | 6           |
| Boursier J   | 2009.5                  | 2                                          | 1           | 1                               | 0                        | 0                                                                        | 1                     | 1                 | 6           |
| Cai X        | 2008                    | 2                                          | 1           | 1                               | 1                        | 0                                                                        | 1                     | 1                 | 7           |
| Chang Y      | 1986.5                  | 2                                          | 1           | 1                               | 1                        | 2                                                                        | 1                     | 1                 | 9           |
| Ekstedt M    | 2011                    | 2                                          | 1           | 1                               | 1                        | 0                                                                        | 0                     | 0                 | 5           |
| El Azeem HA  | 1998.5                  | 0                                          | 1           | 1                               | 1                        | 2                                                                        | 1                     | 1                 | 7           |

Supplementary Table 3. Continued

| Study author   | Study year: median year | Representativeness of the study population | Sample size | Ascertainment of baseline NAFLD | Ascertainment of outcome | Comparability of study population on the basis of the design or analysis | Duration of follow-up | Loss to follow-up | Total score |
|----------------|-------------------------|--------------------------------------------|-------------|---------------------------------|--------------------------|--------------------------------------------------------------------------|-----------------------|-------------------|-------------|
| Fan JG         | 2008                    | 2                                          | 1           | 1                               | 1                        | 0                                                                        | 1                     | 0                 | 6           |
| Fracanzani AL  | 2011                    | 2                                          | 1           | 1                               | 1                        | 2                                                                        | 1                     | 1                 | 9           |
| Grimaudo S     | 1996.5                  | 2                                          | 1           | 1                               | 1                        | 0                                                                        | 1                     | 1                 | 7           |
| Hafidadottir S | 1990                    | 2                                          | 1           | 1                               | 1                        | 2                                                                        | 1                     | 1                 | 9           |
| Hagström H     | 1990                    | 2                                          | 1           | 1                               | 1                        | 2                                                                        | 1                     | 1                 | 9           |
| Hagström H     | 2014.5                  | 2                                          | 1           | 1                               | 1                        | 2                                                                        | 1                     | 1                 | 9           |
| Henson JB      | 2007                    | 2                                          | 1           | 1                               | 1                        | 2                                                                        | 1                     | 1                 | 9           |
| Hwang YC       | 1997.5                  | 2                                          | 1           | 1                               | 1                        | 2                                                                        | 0                     | 1                 | 8           |
| Iritani S      | 2006.5                  | 2                                          | 1           | 1                               | 1                        | 0                                                                        | 1                     | 1                 | 7           |
| Ito T          | 2014.5                  | 2                                          | 1           | 1                               | 1                        | 0                                                                        | 0                     | 1                 | 6           |
| Izumi T        | 2007.5                  | 2                                          | 1           | 1                               | 1                        | 0                                                                        | 1                     | 1                 | 7           |
| Kaps L         | 2002.5                  | 0                                          | 1           | 1                               | 1                        | 2                                                                        | 1                     | 0                 | 6           |
| Käräjämäki AJ  | 2002                    | 0                                          | 1           | 1                               | 1                        | 0                                                                        | 1                     | 1                 | 5           |
| Käräjämäki AJ  | 2003.5                  | 2                                          | 1           | 1                               | 1                        | 2                                                                        | 1                     | 1                 | 9           |
| Kawamura Y     | 2009.5                  | 2                                          | 1           | 1                               | 1                        | 2                                                                        | 1                     | 1                 | 9           |
| Kim GA         | 1999                    | 2                                          | 1           | 1                               | 1                        | 2                                                                        | 1                     | 1                 | 9           |
| Kogiso T       | 2006                    | 2                                          | 1           | 1                               | 1                        | 0                                                                        | 1                     | 1                 | 7           |
| Kuroe K        | 2007.5                  | 2                                          | 1           | 1                               | 1                        | 0                                                                        | 1                     | 1                 | 7           |
| Labenz C       | 2007.5                  | 2                                          | 1           | 1                               | 1                        | 0                                                                        | 1                     | 1                 | 7           |
| Labenz C       | 2005                    | 2                                          | 1           | 1                               | 1                        | 2                                                                        | 1                     | 1                 | 9           |
| Lee TY         | 2011                    | 0                                          | 1           | 1                               | 1                        | 0                                                                        | 1                     | 1                 | 5           |
| Loomba R       | 2006.5                  | 2                                          | 1           | 1                               | 1                        | 0                                                                        | 0                     | 1                 | 6           |
| Mann JP        | 2004.5                  | 1                                          | 0           | 1                               | 1                        | 0                                                                        | 1                     | 1                 | 5           |
| Marot A        | 2010                    | 2                                          | 1           | 1                               | 1                        | 0                                                                        | 1                     | 1                 | 7           |
| Ming J         | 2005.5                  | 1                                          | 1           | 1                               | 1                        | 2                                                                        | 1                     | 1                 | 8           |
| Natarajan Y    | 2012                    | 2                                          | 1           | 1                               | 1                        | 0                                                                        | 1                     | 1                 | 7           |
| Niriella MA    | 2010.5                  | 2                                          | 1           | 1                               | 1                        | 2                                                                        | 1                     | 0                 | 8           |
| Niriella MA    | 1997                    | 2                                          | 1           | 1                               | 1                        | 0                                                                        | 1                     | 1                 | 7           |

Supplementary Table 3. Continued

| Study author     | Study year: median year | Representativeness of the study population | Sample size | Ascertainment of baseline NAFLD | Ascertainment of outcome | Comparability of study population on the basis of the design or analysis | Duration of follow-up | Loss to follow-up | Total score |
|------------------|-------------------------|--------------------------------------------|-------------|---------------------------------|--------------------------|--------------------------------------------------------------------------|-----------------------|-------------------|-------------|
| Önnerhag K       | 2010.5                  | 2                                          | 1           | 1                               | 1                        | 2                                                                        | 0                     | 1                 | 8           |
| Park H           | 2003.5                  | 2                                          | 1           | 1                               | 1                        | 2                                                                        | 0                     | 1                 | 8           |
| Pelusi S         | 2008                    | 1                                          | 0           | 1                               | 1                        | 2                                                                        | 1                     | 0                 | 6           |
| Seko Y           | 2006                    | 2                                          | 1           | 1                               | 1                        | 0                                                                        | 0                     | 1                 | 6           |
| Seko Y           | 1991.5                  | 2                                          | 1           | 1                               | 1                        | 2                                                                        | 1                     | 1                 | 9           |
| Simon TG         | 1991                    | 2                                          | 1           | 1                               | 1                        | 2                                                                        | 1                     | 1                 | 9           |
| Simon TG         | 2008                    | 2                                          | 1           | 1                               | 1                        | 2                                                                        | 1                     | 1                 | 9           |
| Sinn DH          | 2008                    | 2                                          | 1           | 1                               | 1                        | 2                                                                        | 0                     | 1                 | 8           |
| Sinn DH          | 2008                    | 2                                          | 1           | 1                               | 1                        | 2                                                                        | 0                     | 1                 | 8           |
| Sinn DH          | 1993.5                  | 2                                          | 1           | 1                               | 1                        | 2                                                                        | 1                     | 1                 | 9           |
| Stepanova M      | 2005.5                  | 2                                          | 1           | 1                               | 1                        | 0                                                                        | 0                     | 1                 | 6           |
| Sung KC          | 1990                    | 2                                          | 1           | 1                               | 1                        | 2                                                                        | 1                     | 1                 | 9           |
| Treeraprertsuk S | 1998                    | 2                                          | 1           | 1                               | 1                        | 0                                                                        | 1                     | 1                 | 7           |
| VanWagner LB     | 2005.5                  | 2                                          | 1           | 1                               | 1                        | 0                                                                        | 1                     | 1                 | 7           |
| Vilar-Gomez E    | 2012                    | 2                                          | 1           | 1                               | 1                        | 0                                                                        | 1                     | 1                 | 7           |
| Wei Z            | 1997.5                  | 2                                          | 0           | 1                               | 1                        | 0                                                                        | 0                     | 0                 | 4           |
| Wong VW          | 2010                    | 2                                          | 1           | 1                               | 0                        | 0                                                                        | 1                     | 1                 | 6           |
| Wu J             | 2003.5                  | 2                                          | 1           | 1                               | 0                        | 0                                                                        | 1                     | 1                 | 6           |
| Xun YH           | 2012                    | 2                                          | 1           | 1                               | 1                        | 0                                                                        | 1                     | 1                 | 7           |
| Yamamoto K       | 2005.5                  | 2                                          | 1           | 1                               | 1                        | 0                                                                        | 1                     | 1                 | 7           |
| Zeb I            | 2003.5                  | 2                                          | 1           | 1                               | 1                        | 0                                                                        | 1                     | 1                 | 7           |
| Kawanaka M       | 2010.5                  | 2                                          | 1           | 1                               | 1                        | 0                                                                        | 1                     | 1                 | 7           |
| Tada T           | 2006.5                  | 2                                          | 1           | 1                               | 1                        | 0                                                                        | 1                     | 1                 | 7           |
